# Supplementary material for: Rhenium(i) tricarbonyl polypyridine complexes showing strong absorption of visible light and long-lived triplet excited states as a triplet photosensitizer for triplet–triplet annihilation upconversion
Source: Royal Society of Chemistry journal article supplement (doi:10.1039/c2dt30804e), 2012-01-01
Supplement: c2dt30804e.pdf [file c2dt30804e.pdf]

Electronic Supplementary Information for:

# Rhenium(I) tricarbonyl polypyridine complexes showing strong absorption of visible light absorption and long-lived triplet excited states as triplet photosensitizer for triplet-triplet annihilation upconversion

Xiuyu Yi, Jianzhang Zhao,\* Wanhua Wu, Dandan Huang, Shaomin Ji and Jifu Sun

State Key Laboratory of Fine Chemicals, School of Chemical Engineering, Dalian University of Technology, E-208 West Campus, 2 Ling Gong Road, Dalian 116024, P. R. China.

Phone/Fax: +86 411 8498 6236

E-mail: zhaojzh@dlut.edu.cn

Group homepage: <http://finechem.dlut.edu.cn/photochem>

## Index

|                                      |     |
|--------------------------------------|-----|
| 1.0 NMR and HRMS spectra.....        | S2  |
| 2.0 Transient absorption details ... | S17 |
| 3.0 TTA upconversion details ...     | S18 |
| 4.0 DFT calculation details ...      | S21 |

## 1.0 NMR and HRMS spectra.

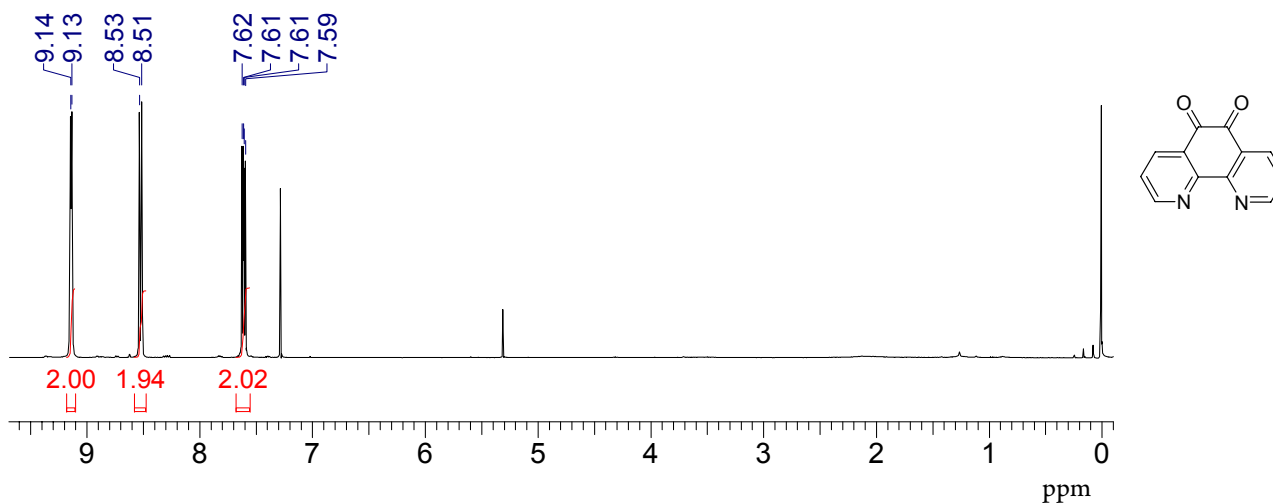

Figure S1.  $^1\text{H}$  NMR of 1,10-phenanthroline-5,6-dione (400 MHz,  $\text{CDCl}_3$ ),  $20^\circ\text{C}$ .

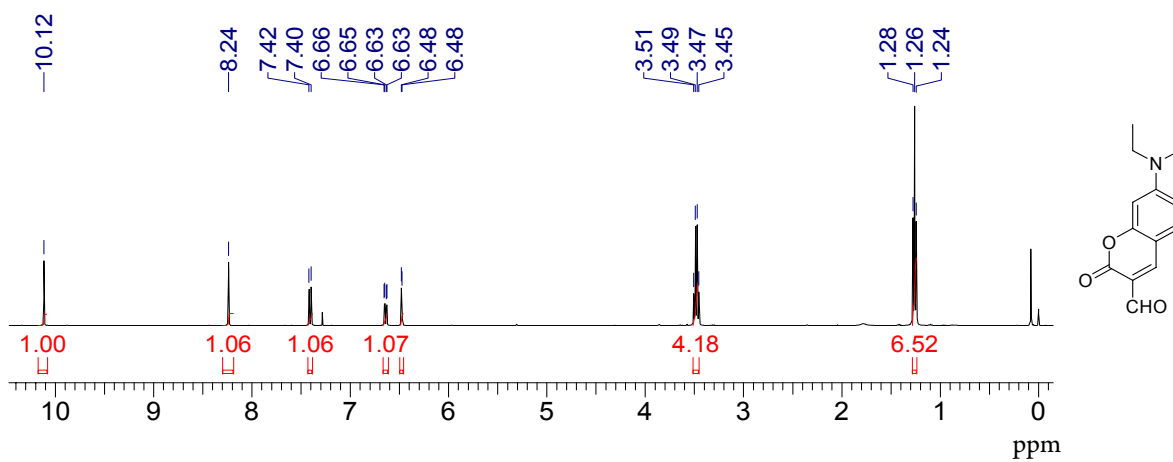

Figure S2.  $^1\text{H}$  NMR of 7-diethylamino-2-oxo-2H-chromene-3-carboxyldehyde (400 MHz,  $\text{CDCl}_3$ ),  $20^\circ\text{C}$ .

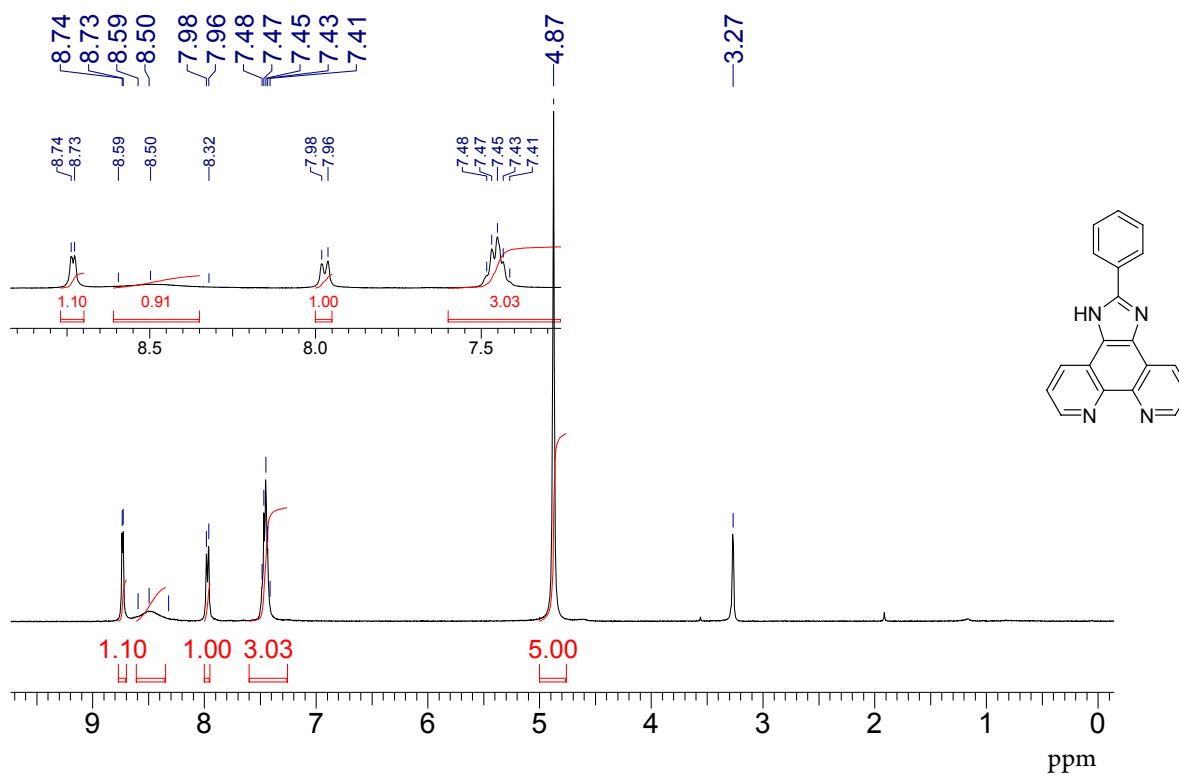

Figure S3. <sup>1</sup>H NMR of L-0 in methanol-d<sub>4</sub> (400 MHz), 20°C.

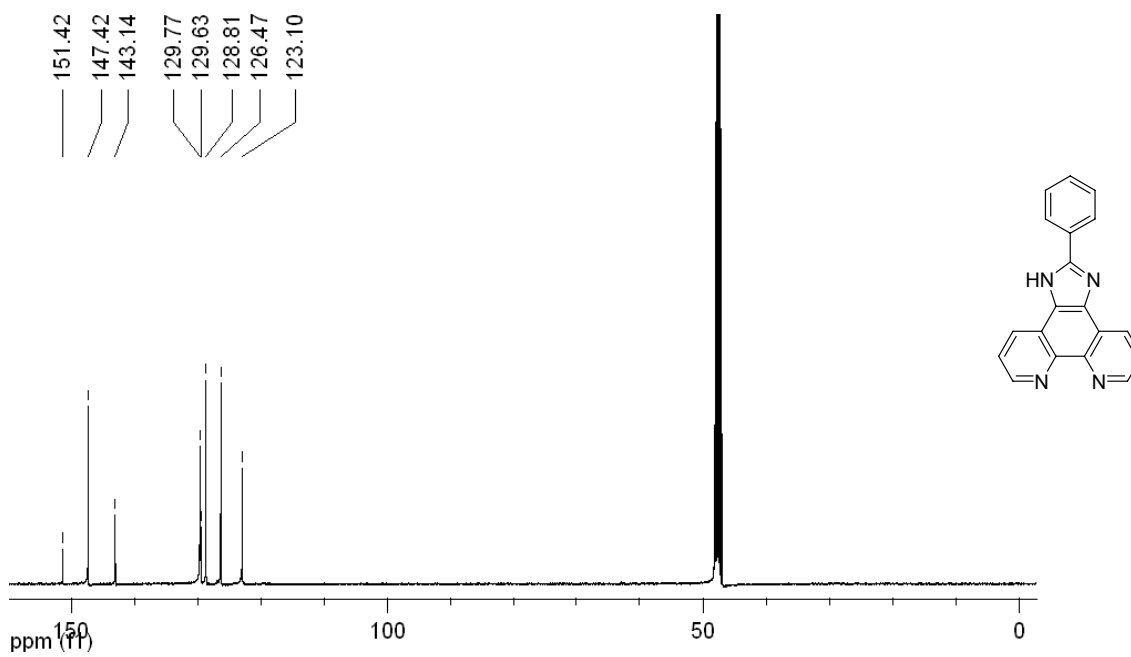

Figure S4. <sup>13</sup>C NMR of L-0 in methanol-d<sub>4</sub> (100 MHz), 20°C.

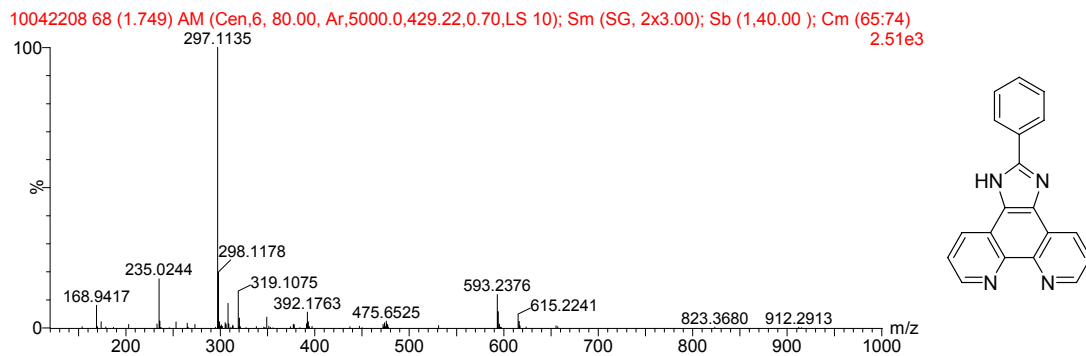

Figure S5. TOF HRMS ESI of L-0, 20°C.

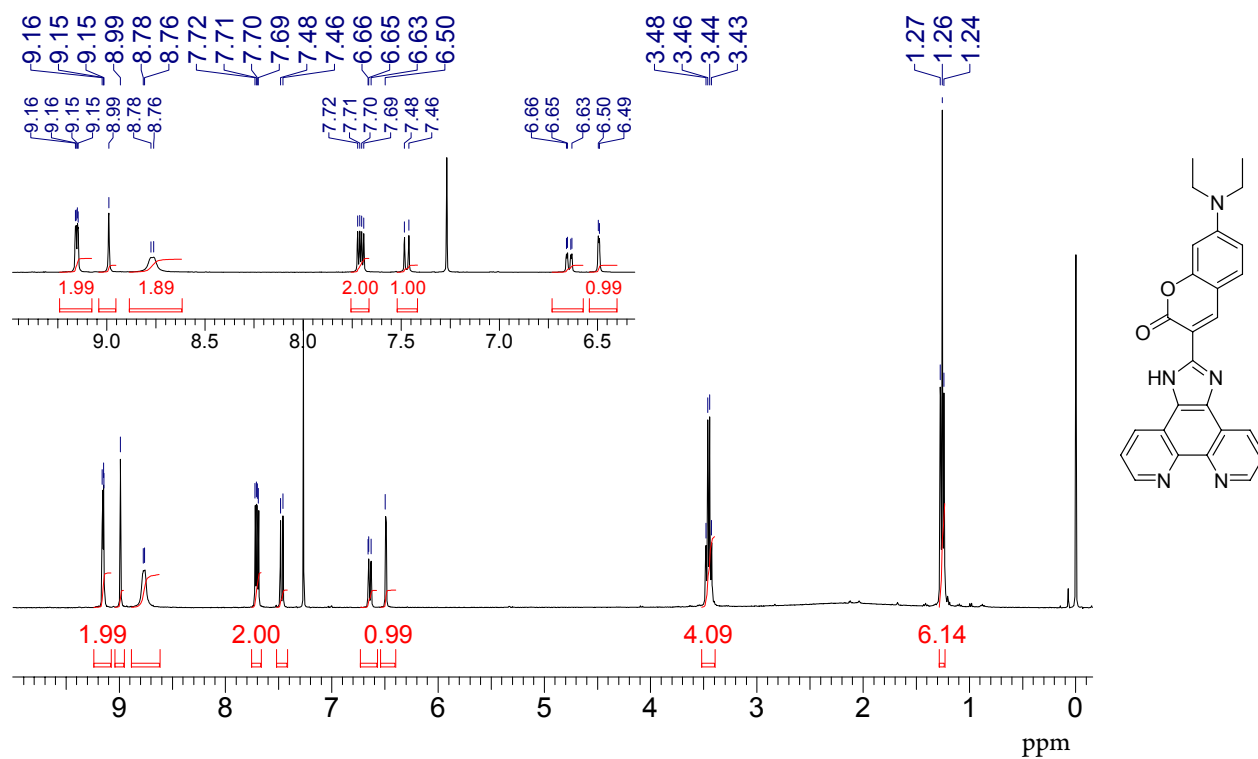

Figure S6. <sup>1</sup>H NMR of L-1 in CDCl<sub>3</sub>(400 MHz), 20°C.

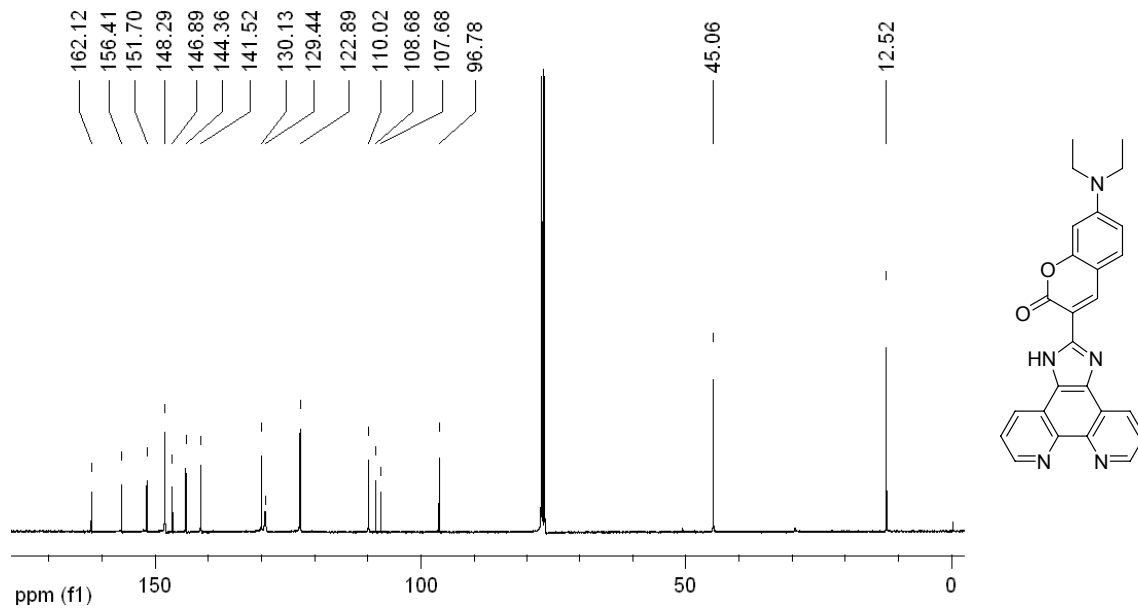

Figure S7.  $^{13}\text{C}$  NMR of L-1 in  $\text{CDCl}_3$  (100 MHz),  $20^\circ\text{C}$ .

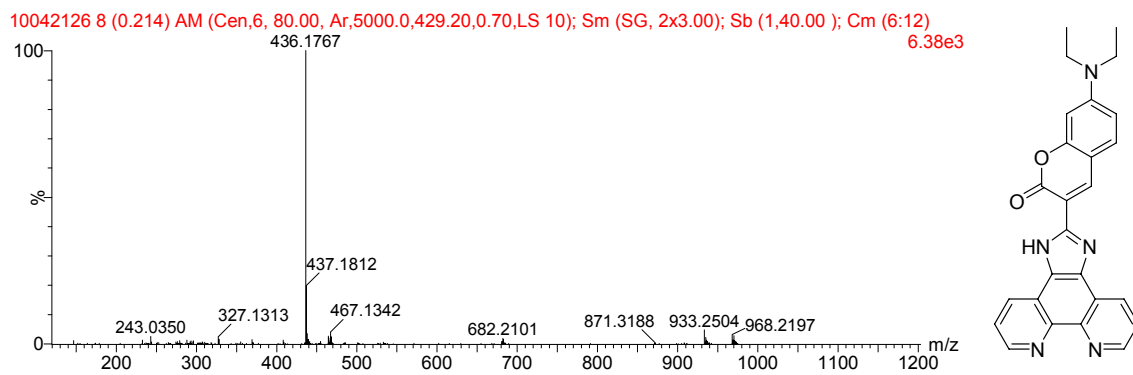

Figure S8. TOF HRMS ESI of L-1,  $20^\circ\text{C}$ .

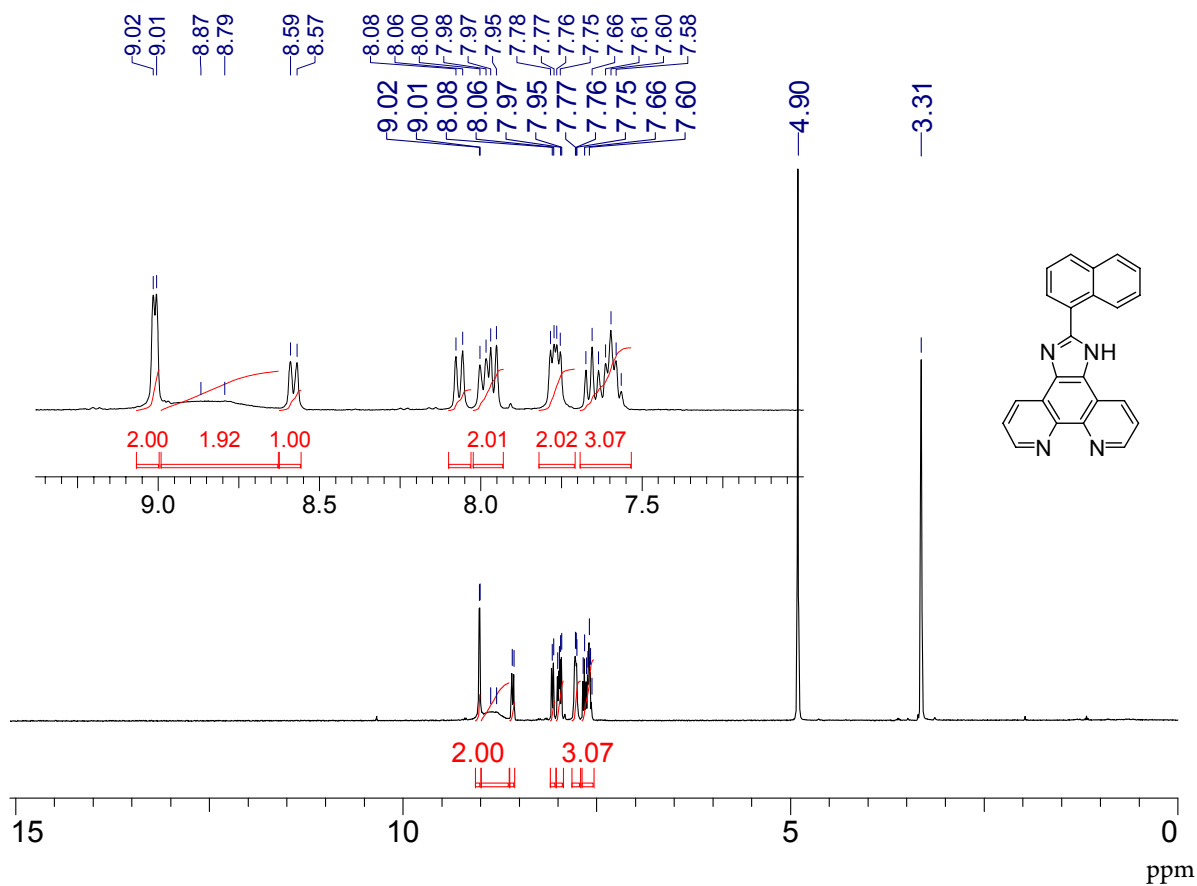

Figure S9. <sup>1</sup>H NMR of L-2 in methanol-d<sub>4</sub> (400 MHz), 20°C.

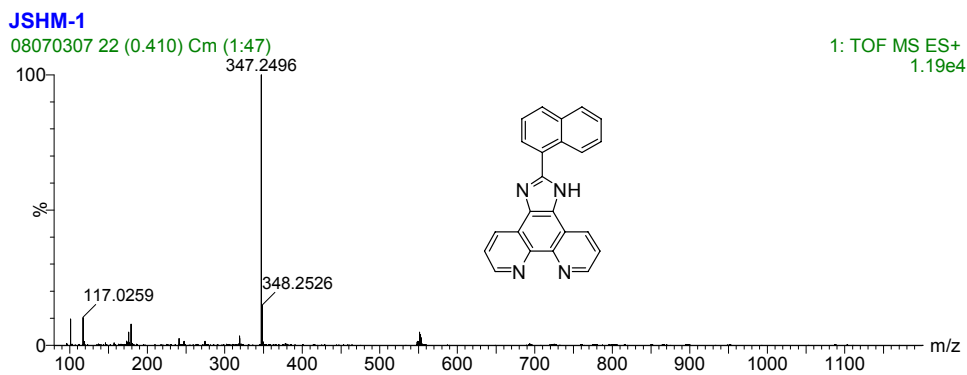

Figure S10. TOF HRMS ESI of L-2, 20°C.

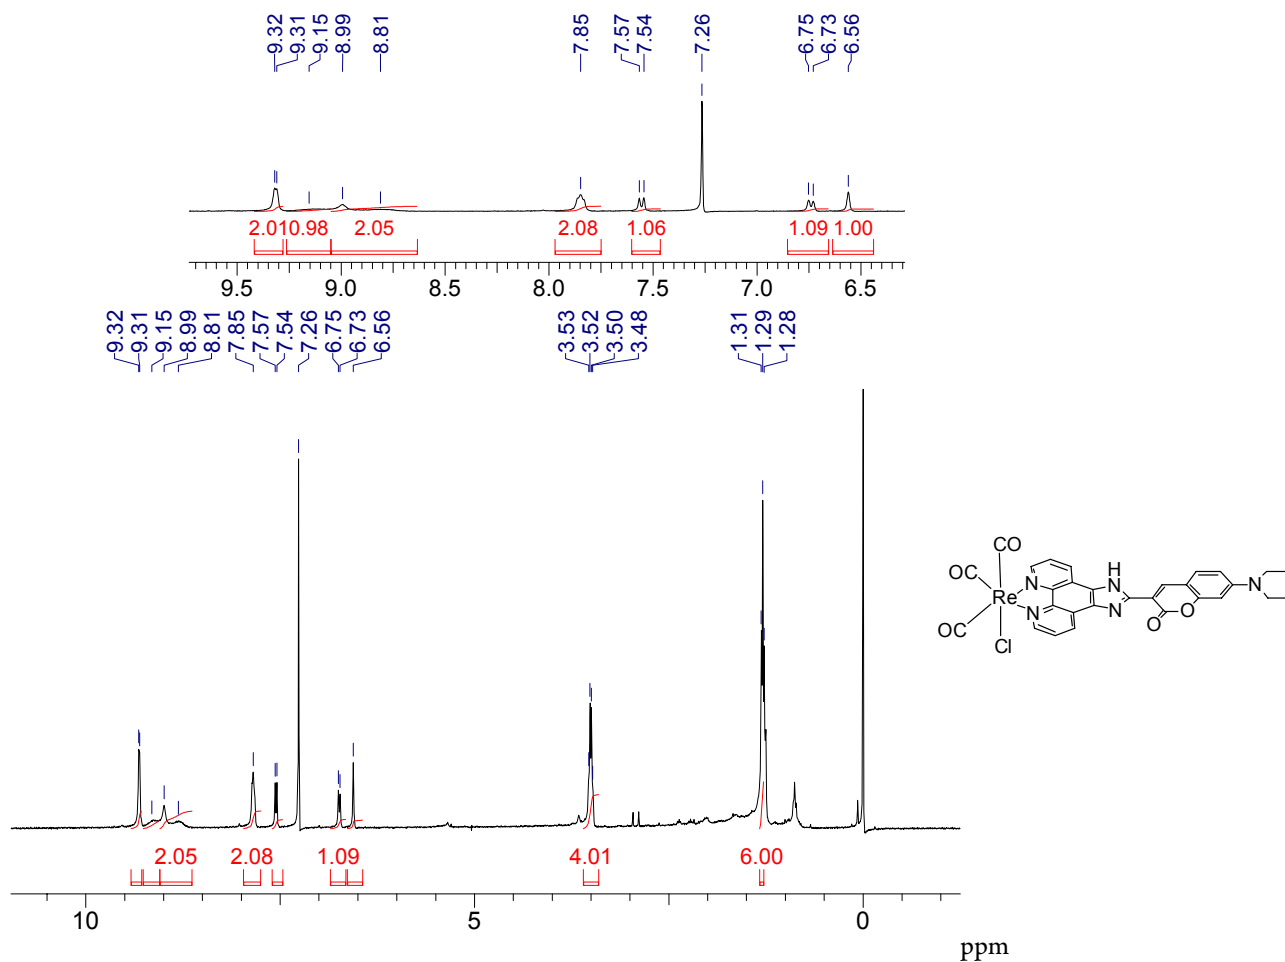

**Figure S11.**  $^1\text{H}$  NMR of **Re-1** in  $\text{CDCl}_3$  (400 MHz),  $20^\circ\text{C}$ .

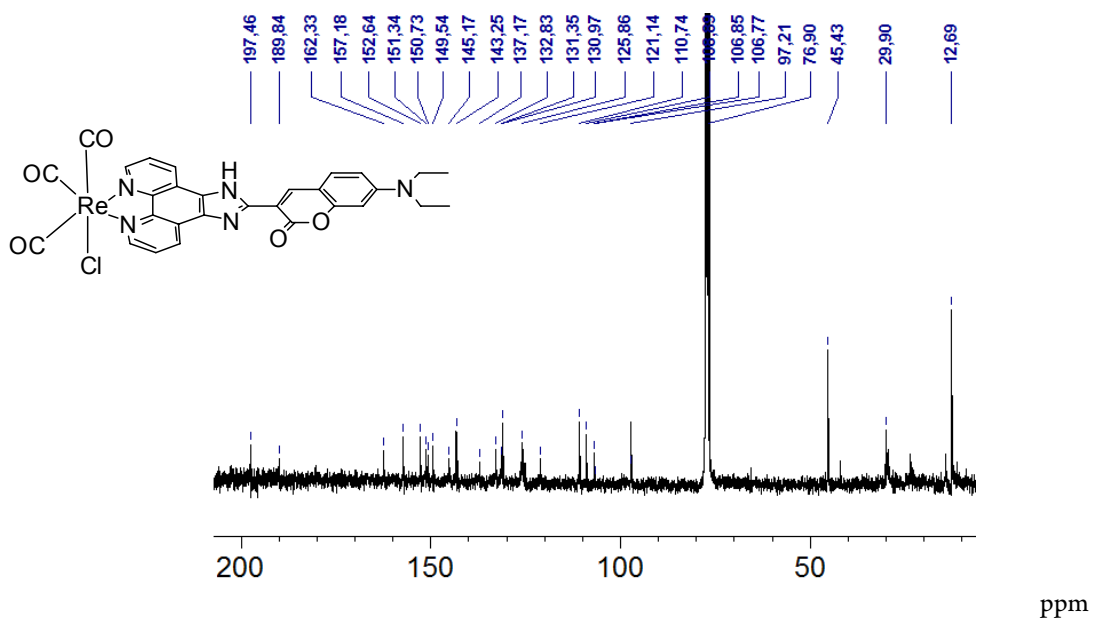

**Figure S12.**  $^{13}\text{C}$  NMR of **Re-1** in  $\text{CDCl}_3$  (100 MHz),  $20^\circ\text{C}$ .

YXY

15:13:58

12022112 19 (0.352) AM (Cen,2, 80.00, Ht,5000.0,0.00,1.00); Sm (Mn, 2x1.00); Cm (7:20)

822

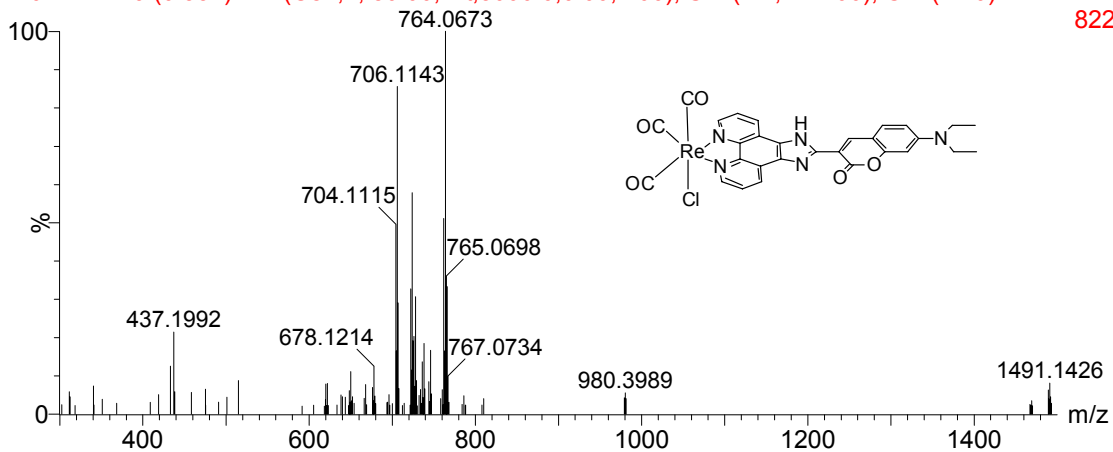

Figure S13. TOF HRMS ESI of **Re-1**, 20°C.

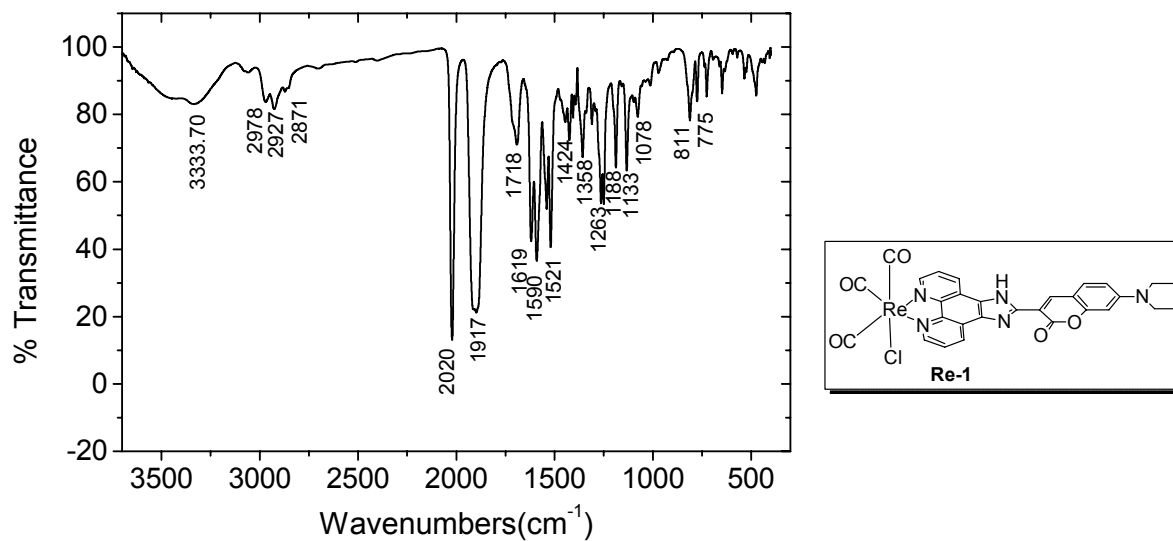

Figure S14. IR spectrum of **Re-1** (KBr disk).



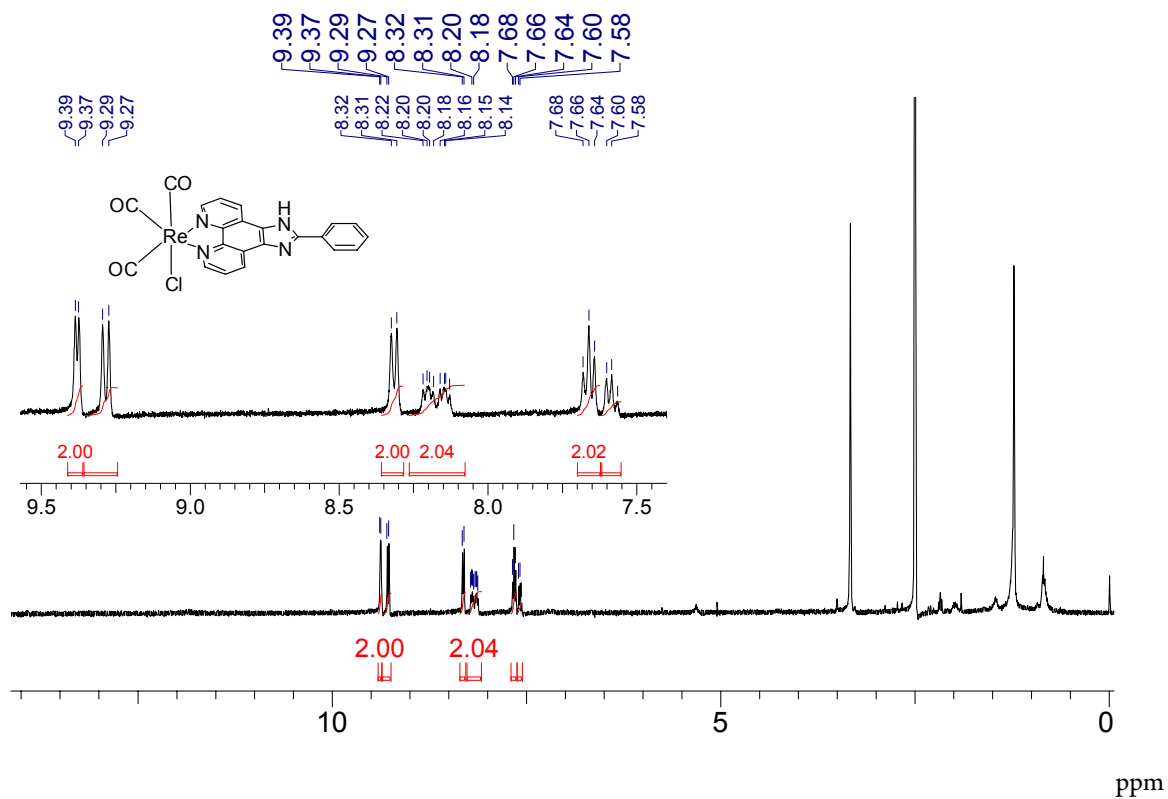

Figure S15. <sup>1</sup>H NMR of Re-0 in DMSO-d<sub>6</sub> (400 MHz), 20°C.

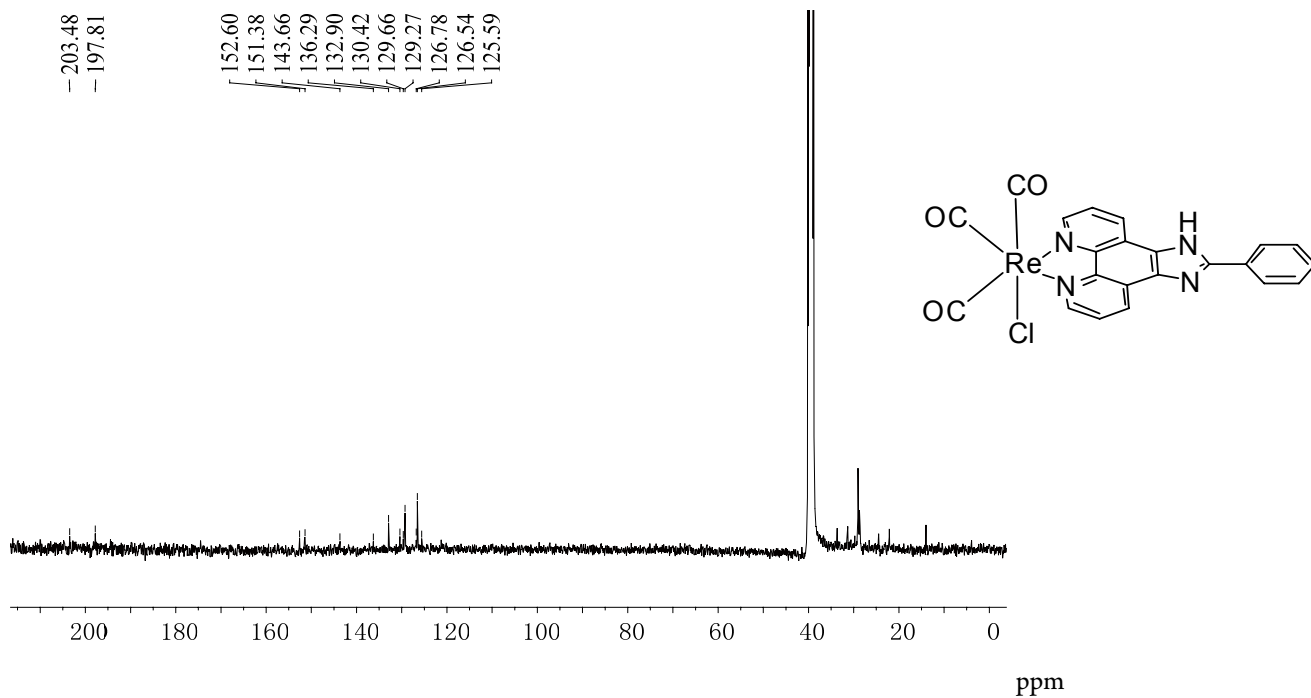

Figure S16. <sup>13</sup>C NMR of Re-0 in DMSO-d<sub>6</sub> (100 MHz), 20°C.

YXY

10:31:17

12022807 9 (0.167) AM (Cen,2, 80.00, Ht,5000.0,0.00,1.00); Sm (Mn, 2x1.00); Cm (9:46)

1.14e4

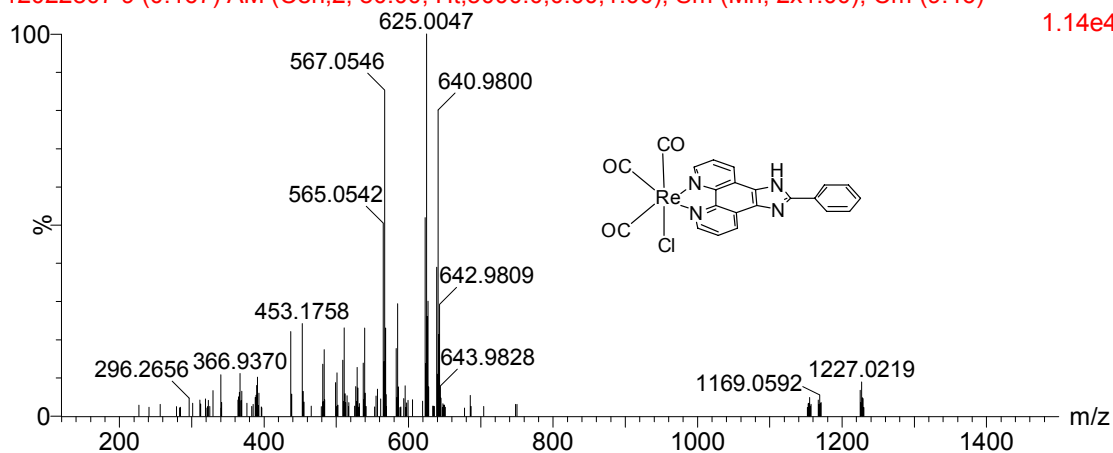

Figure S17. TOF HRMS ESI of **Re-0**, 20°C.

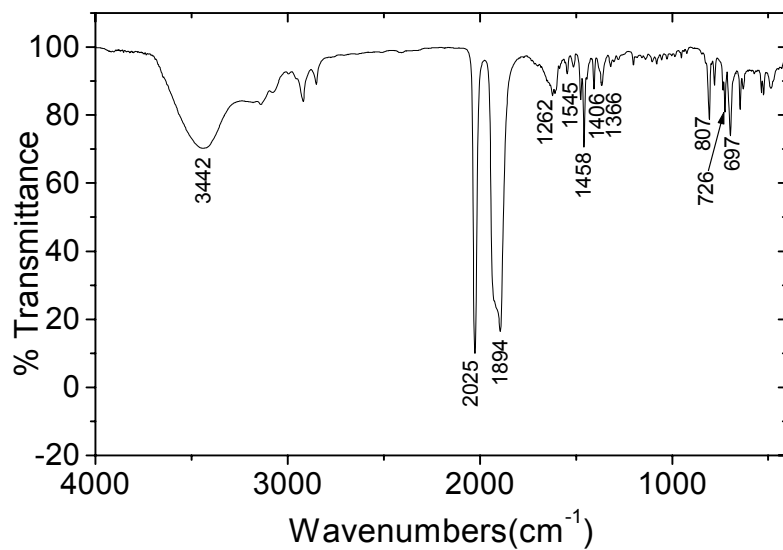

Figure S18. IR spectrum of **Re-0** (KBr disk).

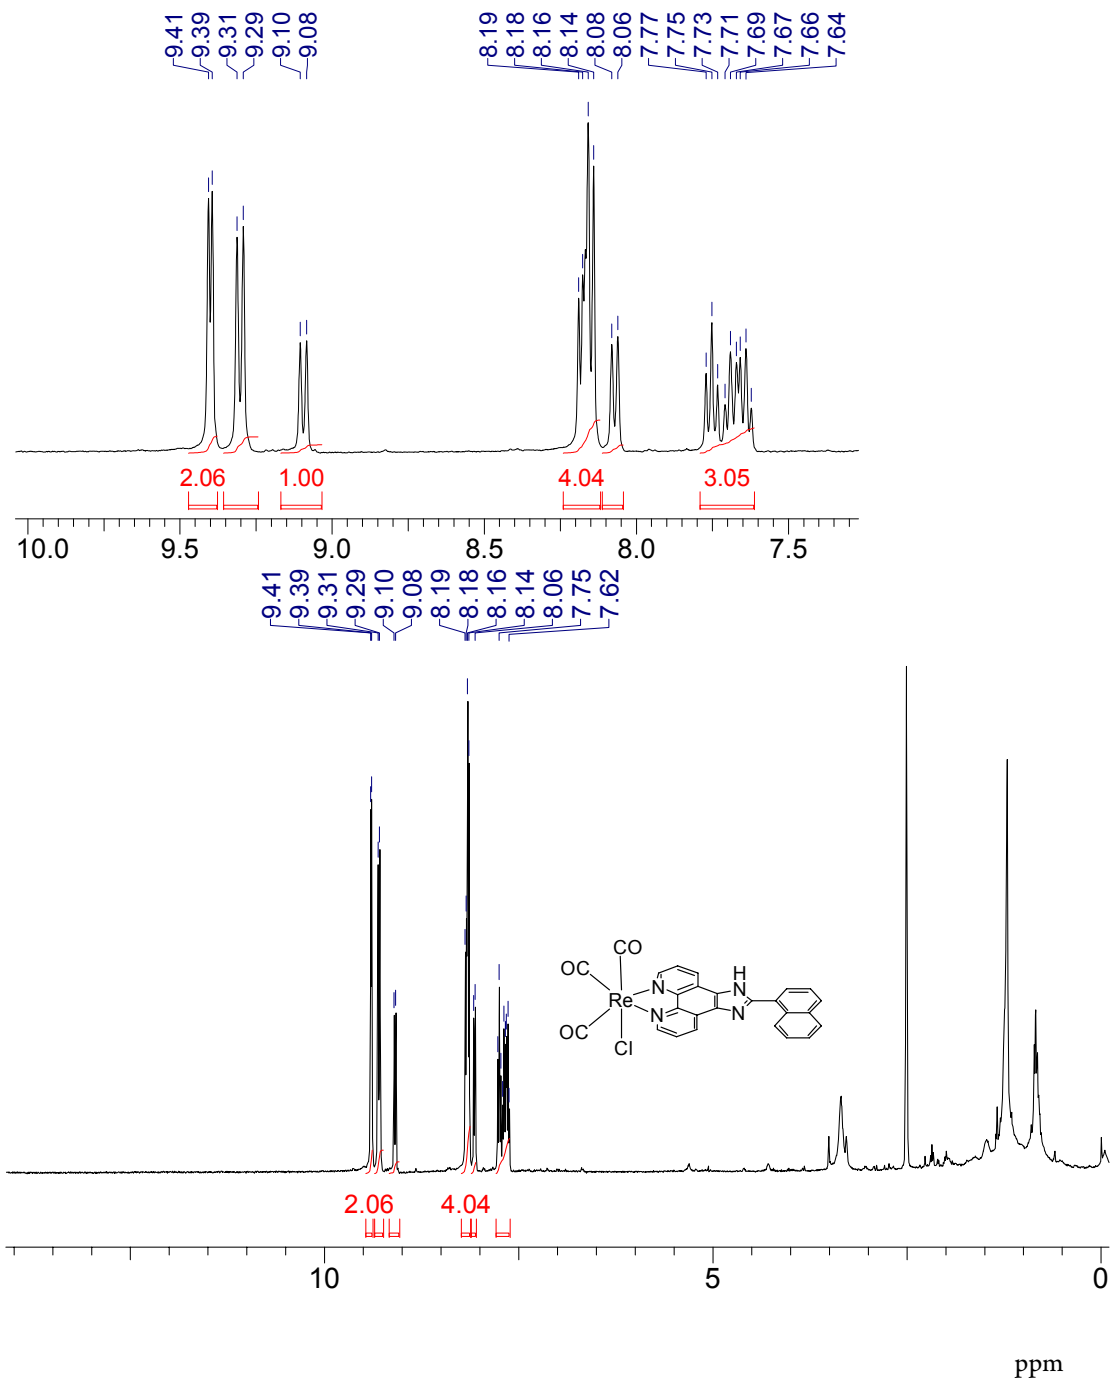

**Figure S19.**  $^1\text{H}$  NMR of **Re-2** in  $\text{DMSO-d}_6$  (400 MHz), 20°C.

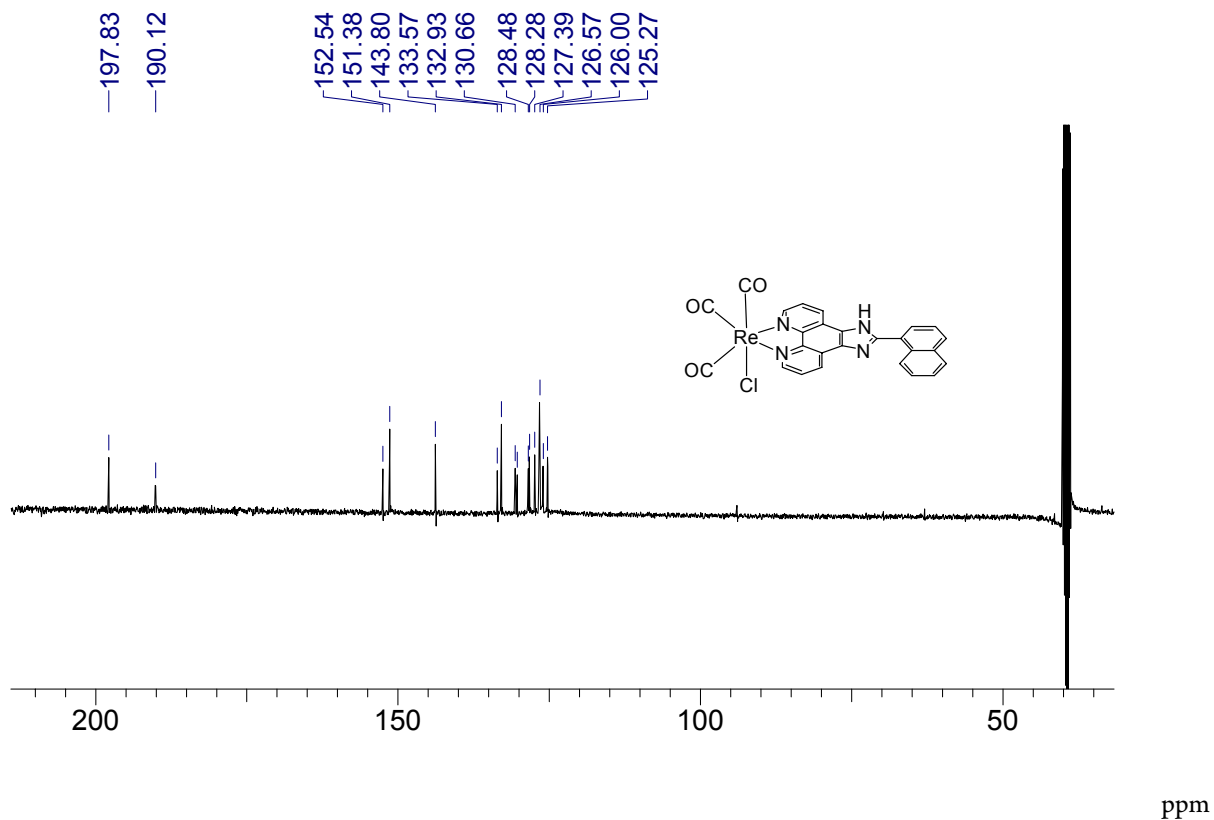

Figure S20.  $^{13}\text{C}$  NMR of **Re-2** in  $\text{DMSO-d}_6$  (100 MHz),  $20^\circ\text{C}$ .

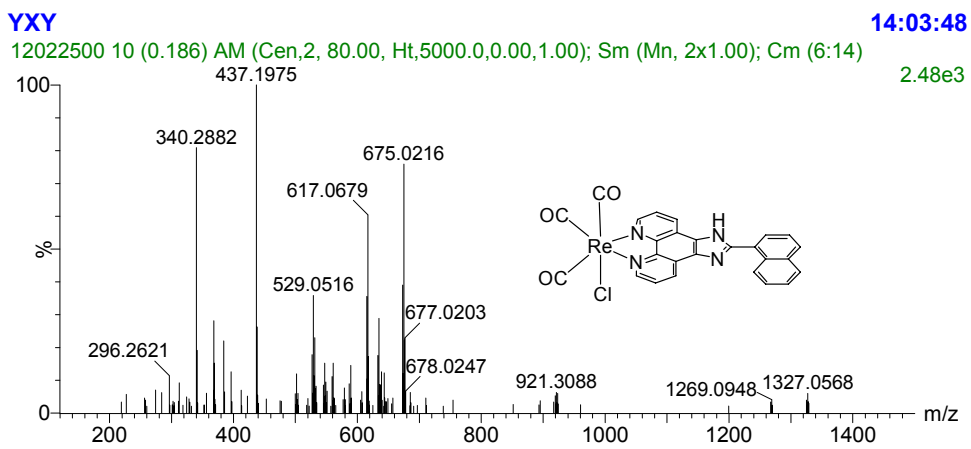

Figure S21. TOF HRMS ESI of **Re-2**,  $20^\circ\text{C}$ .

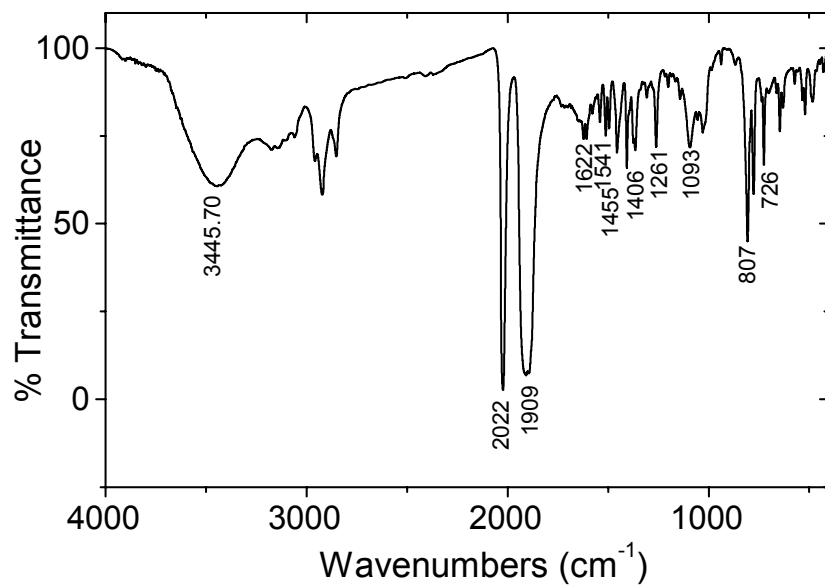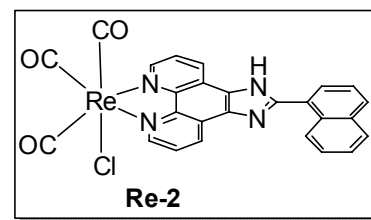

**Figure S22.** IR spectrum of **Re-2** (KBr disk).

## 2.0 DFT calculations.

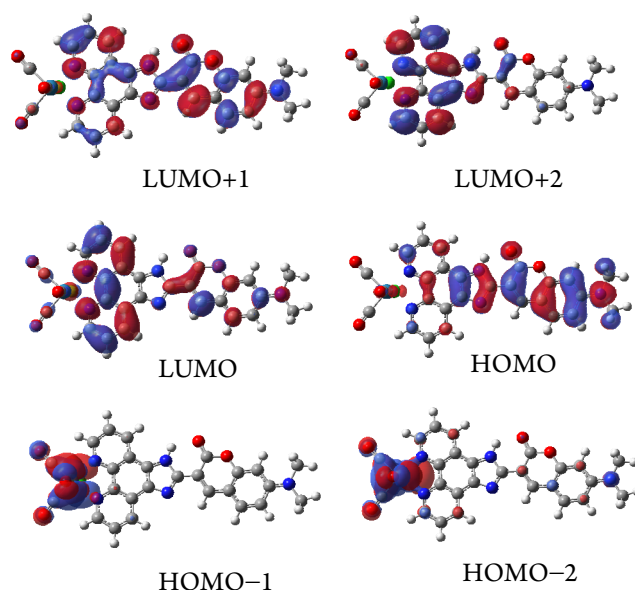

**Figure S23.** Electron density maps of the frontier molecular orbitals of complex **Re-1** based on the optimized ground-state geometry. Toluene was used as solvent in the calculations (PCM model). Calculated at the B3LYP/6-31G/LANL2DZ level with Gaussian 09W.

**Table S1.** Electronic excitation energies (eV) and corresponding oscillator strengths ( $f$ ), main configurations and CI coefficients of the low-lying electronically excited states of complex **Re-1**, Calculated by TDDFT//B3LYP/6-31G/LanL2DZ, based on the DFT//B3LYP/6-31G/LanL2DZ Optimized Ground State Geometries.

|         | Electronic transition          | TDDFT//B3LYP/6-31G       |                     |                          |                 |           |
|---------|--------------------------------|--------------------------|---------------------|--------------------------|-----------------|-----------|
|         |                                | Energy (eV) <sup>a</sup> | $f^b$               | Composition <sup>c</sup> | CI <sup>d</sup> | character |
| Singlet | S <sub>0</sub> →S <sub>1</sub> | 2.63 eV 471 nm           | 0.0025              | H-1 →L                   | 0.6407          | MLCT      |
|         | S <sub>0</sub> →S <sub>2</sub> | 2.69 eV 460 nm           | 0.4306              | H →L                     | 0.5738          | ILCT      |
|         |                                |                          |                     | H-2→L                    | 0.3637          | MLCT      |
|         | S <sub>0</sub> →S <sub>3</sub> | 2.84 eV 437 nm           | 0.0269              | H-2→L                    | 0.5342          | MLCT      |
| Triplet | S <sub>0</sub> →S <sub>4</sub> | 2.92 eV 425 nm           | 1.0011              | H→L+1                    | 0.6938          | ILCT      |
|         | S <sub>0</sub> →T <sub>1</sub> | 2.08 eV 597 nm           | 0.0000 <sup>e</sup> | H→L                      | 0.3954          | ILCT      |
|         |                                |                          |                     | H→L+1                    | 0.5560          | ILCT      |
|         | S <sub>0</sub> →T <sub>2</sub> | 2.48 eV 500 nm           | 0.0000              | H→L                      | 0.4425          | ILCT      |
|         |                                |                          |                     | H-2→L                    | 0.3253          | MLCT      |
|         |                                |                          |                     | H→L+1                    | 0.3126          | ILCT      |
|         | S <sub>0</sub> →T <sub>3</sub> | 2.52 eV 493 nm           | 0.0000              | H-1→L                    | 0.5649          | MLCT      |
|         |                                |                          |                     | H-1→L+1                  | 0.2712          | MLCT      |

<sup>a</sup> Only the selected low-lying excited states are presented. <sup>b</sup> oscillator strength. <sup>c</sup> H stands for HOMO and L stands for LUMO. Only the main configurations are presented. <sup>d</sup> The CI coefficients are in absolute values. <sup>e</sup> No spin-orbital coupling effect was considered, thus the  $f$  values are zero.

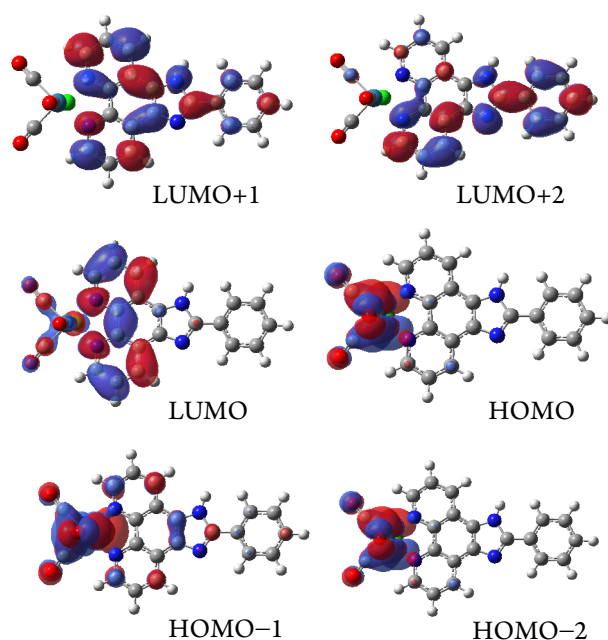

**Figure S24.** Electron density maps of the frontier molecular orbitals of complex **Re-0** based on the optimized ground-state geometry. Toluene was used as solvent in the calculations (PCM model). Calculated at the B3LYP/6-31G/LANL2DZ level with Gaussian 09W.

**Table S2.** Electronic excitation energies (eV) and corresponding oscillator strengths ( $f$ ), main configurations and CI coefficients of the low-lying electronically excited states of complex **Re-0**. Calculated by TDDFT//B3LYP/6-31G/LanL2DZ, based on the DFT//B3LYP/6-31G/LanL2DZ Optimized Ground State Geometries.

|         | Electronic transition | TDDFT//B3LYP/6-31G       |                     |                          |                 |           |
|---------|-----------------------|--------------------------|---------------------|--------------------------|-----------------|-----------|
|         |                       | Energy (eV) <sup>a</sup> | $f^b$               | Composition <sup>c</sup> | CI <sup>d</sup> | character |
| Singlet | $S_0 \rightarrow S_1$ | 2.59 eV 479 nm           | 0.0021              | H→L                      | 0.7038          | MLCT      |
|         | $S_0 \rightarrow S_2$ | 2.72 eV 456 nm           | 0.1107              | H-1→L                    | 0.6980          | MLCT      |
|         | $S_0 \rightarrow S_3$ | 3.08 eV 402 nm           | 0.0188              | H-2→L                    | 0.1339          | MLCT      |
| Triplet | $S_0 \rightarrow T_1$ | 2.48 eV 501 nm           | 0.0000 <sup>e</sup> | H→L+1                    | 0.6808          | MLCT      |
|         |                       |                          |                     | H-2→L+1                  | 0.1770          | MLCT      |
|         |                       |                          |                     | H-1→L+1                  | 0.1542          | MLCT      |
|         | $S_0 \rightarrow T_2$ | 2.52 eV 493 nm           | 0.0000              | H-1→L                    | 0.6677          | MLCT      |
|         |                       |                          |                     | H→L                      | 0.1367          | MLCT      |

<sup>a</sup> Only the selected low-lying excited states are presented. <sup>b</sup> oscillator strength. <sup>c</sup> H stands for HOMO and L stands for LUMO. Only the main configurations are presented. <sup>d</sup> The CI coefficients are in absolute values. <sup>e</sup> No spin-orbital coupling effect was considered, thus the  $f$  values are zero.

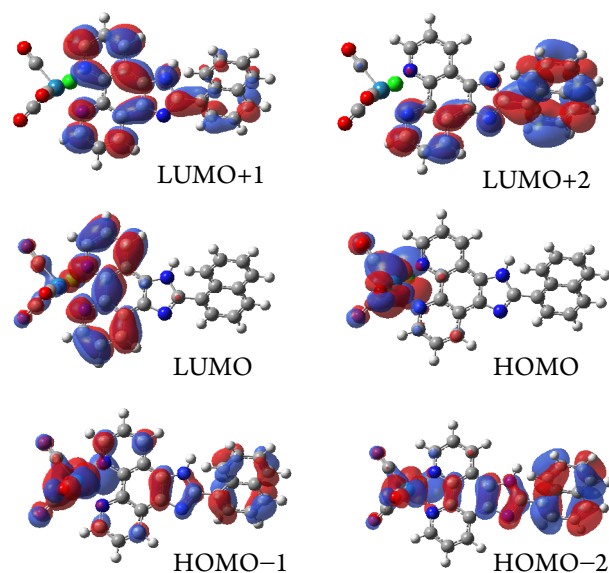

**Figure S25.** Electron density maps of the frontier molecular orbitals of complex **Re-2** based on the optimized ground-state geometry. The solvent toluene was considered in the calculations (PCM model). Calculated at the B3LYP/6-31G/LANL2DZ level with Gaussian 09W.

**Table S3.** Electronic Excitation Energies (eV) and corresponding oscillator Strengths ( $f$ ), main configurations and CI coefficients of the low-lying electronically excited states of complex **Re-2**. Calculated by TDDFT//B3LYP/6-31G/LanL2DZ based on the DFT//B3LYP/6-31G/LanL2DZ Optimized Ground State Geometries.

|                       | Electronic transition | TDDFT//B3LYP/6-31G       |                |                          |                     |           |
|-----------------------|-----------------------|--------------------------|----------------|--------------------------|---------------------|-----------|
|                       |                       | Energy (eV) <sup>a</sup> | $f^b$          | Composition <sup>c</sup> | CI <sup>d</sup>     | character |
| Singlet               | $S_0 \rightarrow S_1$ | 2.60 eV 476 nm           | 0.0020         | H $\rightarrow$ L        | 0.6977              | MLCT      |
|                       | $S_0 \rightarrow S_2$ | 2.73 eV 455 nm           | 0.1158         | H-1 $\rightarrow$ L      | 0.6545              | ILCT      |
|                       |                       |                          |                | H-2 $\rightarrow$ L      | 0.2362              | ILCT      |
|                       |                       |                          |                | H-2 $\rightarrow$ L      | 0.6505              | MLCT      |
|                       | $S_0 \rightarrow S_3$ | 3.03 eV 409 nm           | 0.0216         | H-2 $\rightarrow$ L      | 0.6505              | ILCT      |
|                       | Triplet               | $S_0 \rightarrow T_1$    | 2.45 eV 505 nm | 0.0000 <sup>e</sup>      | H-1 $\rightarrow$ L | 0.2194    |
| H-1 $\rightarrow$ L   |                       |                          |                |                          | 0.3521              | MLCT      |
| H-2 $\rightarrow$ L   |                       |                          |                |                          | 0.6505              | ILCT      |
| $S_0 \rightarrow T_2$ |                       | 2.51 eV 494 nm           | 0.0000         | H-1 $\rightarrow$ L+1    | 0.2743              | MLCT      |
|                       |                       |                          |                | H-1 $\rightarrow$ L      | 0.4100              | ILCT      |
|                       |                       |                          |                | H $\rightarrow$ L        | 0.4376              | MLCT      |

<sup>a</sup> Only the selected low-lying excited states are presented. <sup>b</sup> oscillator strength. <sup>c</sup> H stands for HOMO and L stands for LUMO. Only the main configurations are presented. <sup>d</sup> The CI coefficients are in absolute values. <sup>e</sup> No spin-orbital coupling effect was considered, thus the  $f$  values are zero.



### 3.0 Transient absorption details

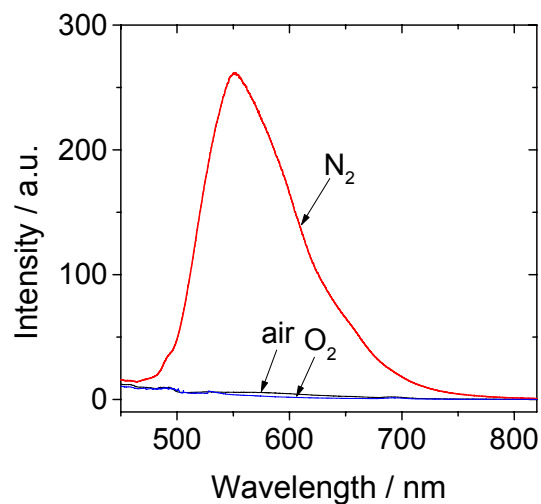

**Figure S26.** The emission spectra of **Re-2** ( $\lambda_{\text{ex}} = 428 \text{ nm}$ ) under different atmosphere.  $c = 1.0 \times 10^{-5} \text{ mol/dm}^3$  in toluene, 25 °C.

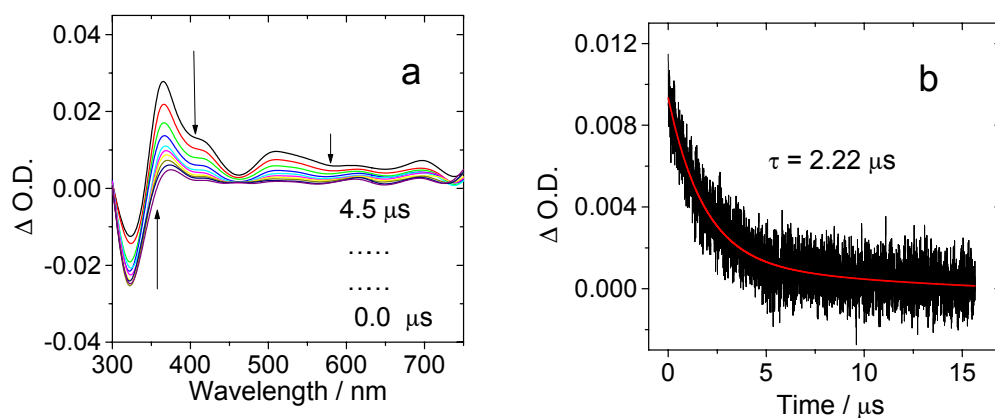

**Figure S27.** Nanosecond time-resolved transient absorption difference spectra of **Re-0** in deaerated toluene at room temperature after pulsed excitation ( $\lambda_{\text{ex}} = 355 \text{ nm}$ ). Decay traces of **Re-0** (b) at 470nm, In deaerated toluene,  $c = 1.0 \times 10^{-5} \text{ M}$ . 25 °C.

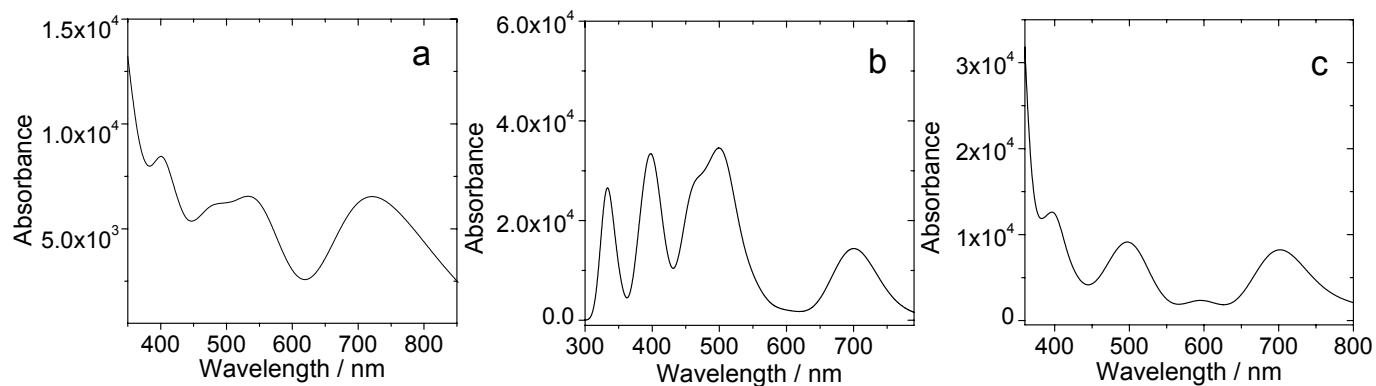

**Figure S28.** The calculated transient absorption spectra were presented (a) **Re-0**, (b) **Re-1** and (c) **Re-2**. Toluene was used as solvent in the calculations. Calculated by DFT at the B3LYP/6-31G level using Gaussian 09W.

### 3.0 TTA upconversion details

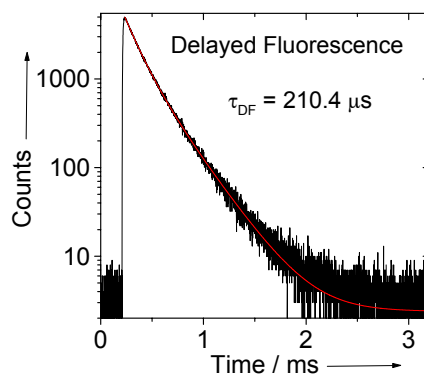

**Figure S29.** Delayed fluorescence observed in the TTA upconversion with **Re-2** as triplet photosensitizer and DPA as the triplet acceptor. Excited at 473 nm (nanosecond pulsed OPO laser synchronized with spectrofluorometer) and monitored at 410 nm. Under this circumstance the **Re-2** is selectively excited and the emission is due to the upconverted emission of DPA.

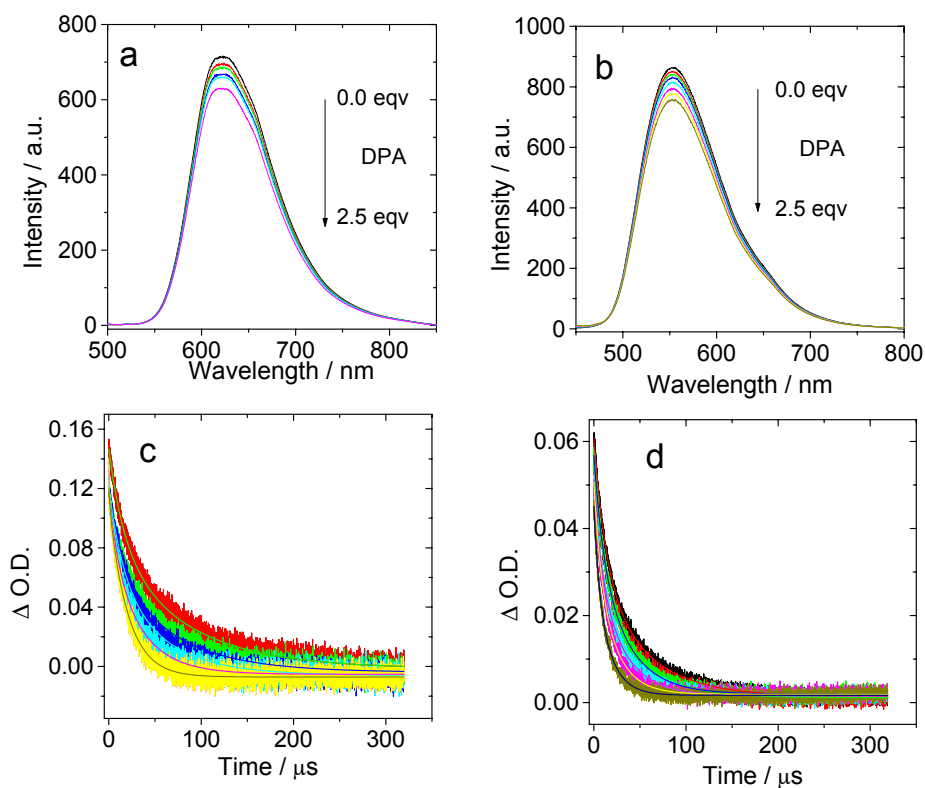

**Figure S30.** Quenching of the phosphorescence of the triplet photosensitizers with increasing the concentration of DPA, (a)  $\text{Ru}(\text{dmb})_3^{2+}$  ( $\lambda_{\text{ex}} = 450 \text{ nm}$ ), (b) **Re-0** ( $\lambda_{\text{ex}} = 439 \text{ nm}$ ). Quenching of the lifetime of the triplet photosensitizers with increasing the concentration of DPA, (c) **Re-1**, (d) **Re-2**.

**Table S4.** The TTA upconversion quantum yields were measured with different quantum yields standards, similar results were observed. The followings are the results with diketopyrrolopyrrole (DPP,  $\Phi_{\text{F}} = 69\%$  in DMSO) and 4-dicyanomethylene-2-methyl-6-(*p*-(dimethylamino)styryl)-4H-pyran (DCM,  $\Phi_{\text{F}} = 10\%$  in dichloromethane)

| Standard           | Coumarin | DPP   | DCM   |
|--------------------|----------|-------|-------|
| $\Phi_{\text{UC}}$ | 17.0%    | 19.4% | 16.7% |

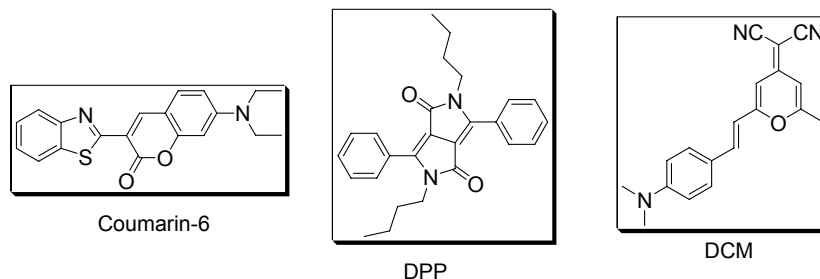

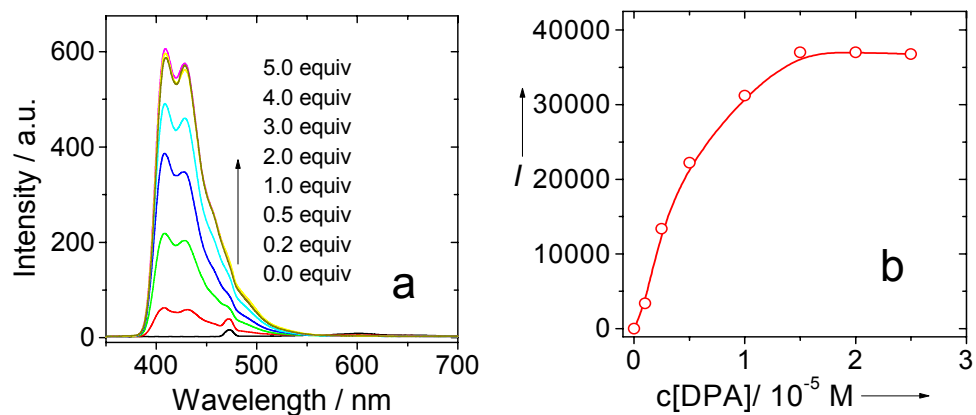

**Figure S31.** Upconverted emission of DPA with increasing DPA concentration. (a) **Re-1** as the triplet sensitizer; (b) integrated upconversion intensity with **Re-1** as triplet sensitizer with increasing DPA concentration; Excited with 473 nm laser (5 mW).  $c[\text{sensitizer}] = 5.0 \times 10^{-6}$  M. In deaerated toluene at 20 °C.

## 4.0 DFT calculation details

### Re-0. Ground state geometry.

Symbolic Z-matrix:

Charge = 0 Multiplicity = 1

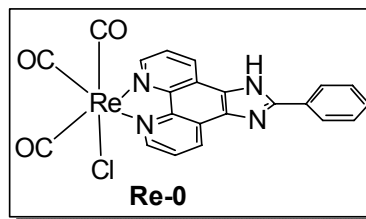

|    |             |             |             |
|----|-------------|-------------|-------------|
| C  | -1.22235000 | 2.69252900  | 0.14173700  |
| C  | 1.18028300  | 2.92135800  | 0.09460200  |
| H  | -2.21464500 | 3.11997200  | 0.14654000  |
| C  | 1.29047800  | 1.51408000  | 0.10066900  |
| H  | 2.06896500  | 3.54312900  | 0.07070900  |
| C  | 0.08876100  | 0.74892800  | 0.12854100  |
| C  | 0.11219100  | -0.69206800 | 0.13085800  |
| C  | 1.33426400  | -1.41040300 | 0.11015000  |
| C  | -1.12381800 | -2.67972000 | 0.14436200  |
| C  | 1.28808400  | -2.81877700 | 0.10815700  |
| C  | 0.05212300  | -3.44837800 | 0.12538600  |
| H  | -2.09876700 | -3.14607200 | 0.14668800  |
| H  | 2.21569000  | -3.37789500 | 0.08896200  |
| H  | -0.02484300 | -4.52862200 | 0.11878600  |
| N  | -1.09991200 | -1.33445000 | 0.15076700  |
| C  | -0.07793800 | 3.50457300  | 0.11506200  |
| H  | -0.19364700 | 4.58121600  | 0.10553800  |
| C  | 2.53899400  | -0.63757500 | 0.08515800  |
| C  | 2.50367800  | 0.76098400  | 0.07795400  |
| C  | 4.61733500  | 0.00056900  | 0.03413400  |
| H  | 4.17561800  | 2.09858700  | 0.01808800  |
| N  | 3.84499900  | -1.09358000 | 0.05914700  |
| N  | 3.83304600  | 1.15289500  | 0.04575900  |
| N  | -1.14333300 | 1.34904800  | 0.15186800  |
| C  | 6.07666700  | -0.00218500 | -0.00262600 |
| C  | 6.74782500  | -1.24052500 | -0.04200300 |
| C  | 8.14106000  | -1.28447800 | -0.07972100 |
| C  | 8.88689900  | -0.09825600 | -0.07894700 |
| C  | 8.22790800  | 1.13599400  | -0.03918400 |
| C  | 6.83283500  | 1.18543000  | -0.00074800 |
| H  | 6.15810700  | -2.14936000 | -0.04337100 |
| H  | 8.64692800  | -2.24371300 | -0.11072900 |
| H  | 9.97075200  | -0.13511200 | -0.10901400 |
| H  | 8.79869200  | 2.05861300  | -0.03753600 |
| H  | 6.34683400  | 2.15657100  | 0.03300700  |
| Re | -2.84635000 | -0.02094900 | 0.04793100  |
| C  | -4.19579500 | 1.32703300  | -0.20896100 |
| O  | -4.98148700 | 2.19160500  | -0.38142000 |
| C  | -3.11753100 | -0.03172800 | 1.94084800  |
| O  | -3.27310000 | -0.03702000 | 3.11729100  |
| Cl | -2.31028300 | -0.00033100 | -2.44731000 |
| C  | -4.15198200 | -1.41048900 | -0.21738100 |
| O  | -4.91066700 | -2.29699300 | -0.39578200 |

1 3 1.0 16 1.5 24 1.5  
2 4 1.5 5 1.0 16 1.5  
3  
4 6 1.5 19 1.5  
5  
6 7 1.5 24 1.5  
7 8 1.5 15 1.5  
8 10 1.5 18 1.5  
9 11 1.5 12 1.0 15 1.5  
10 11 1.5 13 1.0  
11 14 1.0  
12  
13  
14  
15  
16 17 1.0  
17  
18 19 1.5 22 1.0  
19 23 1.0  
20 22 1.5 23 1.0 25 1.0  
21 23 1.0  
22  
23  
24  
25 26 1.5 30 1.5  
26 27 1.5 31 1.0  
27 28 1.5 32 1.0  
28 29 1.5 33 1.0  
29 30 1.5 34 1.0  
30 35 1.0  
31  
32  
33  
34  
35  
36 37 1.0 39 1.0 42 1.0  
37 38 2.0  
38  
39 40 2.0  
40  
41  
42 43 2.0  
43

### Re-0. Triplet state geometry.

Symbolic Z-matrix:

Charge = 0 Multiplicity = 3

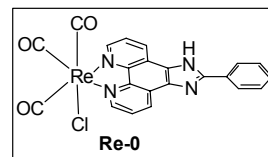

|    |             |             |             |
|----|-------------|-------------|-------------|
| C  | -1.22198900 | 2.71900700  | 0.07353500  |
| C  | 1.19974500  | 2.90086200  | 0.02059600  |
| H  | -2.21210100 | 3.15128800  | 0.09242900  |
| C  | 1.29367000  | 1.49576800  | 0.04517100  |
| H  | 2.08611400  | 3.52311400  | -0.00241700 |
| C  | 0.10165100  | 0.71515400  | 0.07903300  |
| C  | 0.12863800  | -0.69290700 | 0.12298200  |
| C  | 1.35189400  | -1.44441300 | 0.12846300  |
| C  | -1.12659300 | -2.68801300 | 0.19792300  |
| C  | 1.28712700  | -2.84199500 | 0.16857700  |
| C  | 0.03680300  | -3.46690500 | 0.20386200  |
| H  | -2.10195100 | -3.15499000 | 0.22138100  |
| H  | 2.20458700  | -3.41845300 | 0.17043400  |
| H  | -0.04868300 | -4.54545600 | 0.23214800  |
| N  | -1.10242500 | -1.33928600 | 0.15987200  |
| C  | -0.09657600 | 3.49909000  | 0.04191300  |
| H  | -0.19729300 | 4.57738200  | 0.03591900  |
| C  | 2.54996500  | -0.67122600 | 0.08586200  |
| C  | 2.50278000  | 0.73653700  | 0.04428200  |
| C  | 4.62228400  | -0.00464300 | 0.02045200  |
| H  | 4.15468200  | 2.08836800  | -0.03844400 |
| N  | 3.86184500  | -1.10992200 | 0.07143500  |
| N  | 3.82654400  | 1.13738900  | 0.00326700  |
| N  | -1.17143100 | 1.31990600  | 0.06806200  |
| C  | 6.08026800  | 0.00539600  | -0.01495600 |
| C  | 6.76592000  | -1.22718100 | -0.01003400 |
| C  | 8.15963400  | -1.25845700 | -0.04520900 |
| C  | 8.89298900  | -0.06433400 | -0.08552600 |
| C  | 8.22019900  | 1.16401300  | -0.09016000 |
| C  | 6.82451700  | 1.20145400  | -0.05505200 |
| H  | 6.18812700  | -2.14309400 | 0.02051400  |
| H  | 8.67545100  | -2.21282500 | -0.04175600 |
| H  | 9.97718000  | -0.09070200 | -0.11319700 |
| H  | 8.78106700  | 2.09205700  | -0.12109400 |
| H  | 6.32875600  | 2.16719600  | -0.05875700 |
| Re | -2.79745300 | 0.01774900  | 0.03628500  |
| C  | -4.13926500 | 1.37272300  | -0.28802000 |
| O  | -4.93481800 | 2.21299900  | -0.50966700 |
| C  | -3.03412500 | 0.17421000  | 1.95311400  |
| O  | -3.18798500 | 0.26778200  | 3.11676800  |
| Cl | -2.61967900 | -0.37852600 | -2.45192700 |
| C  | -4.17553300 | -1.40435000 | 0.00737100  |
| O  | -4.96946600 | -2.26896800 | -0.00451000 |

1 3 1.0 16 2.0 24 1.0

2 4 1.5 5 1.0 16 1.5

3

4 6 1.5 19 1.5

5

6 7 1.5 24 1.0





|    |             |             |             |
|----|-------------|-------------|-------------|
| C  | -2.84036100 | -2.70878900 | 0.14417500  |
| C  | -0.42506000 | -2.74860100 | 0.12641900  |
| C  | -1.63411400 | -3.42863900 | 0.13571600  |
| H  | -3.79575500 | -3.21402900 | 0.14088200  |
| H  | 0.52452800  | -3.26985100 | 0.11609500  |
| H  | -1.66672600 | -4.51122100 | 0.13137600  |
| N  | -2.87044700 | -1.36365700 | 0.14742600  |
| C  | -2.04697700 | 3.51334400  | 0.09530100  |
| H  | -2.20604200 | 4.58437500  | 0.07801900  |
| C  | 0.73868600  | -0.51895800 | 0.10863400  |
| C  | 0.64461000  | 0.88112300  | 0.09774900  |
| C  | 2.77561300  | 0.21839100  | 0.07729400  |
| H  | 2.33054400  | 2.27269100  | 0.06259500  |
| N  | 2.06227600  | -0.91991100 | 0.09667500  |
| N  | 1.94926400  | 1.33181000  | 0.07847100  |
| C  | 4.22414700  | 0.30353100  | 0.05410600  |
| C  | 5.00194500  | -0.83412000 | 0.04695300  |
| H  | 4.50148500  | -1.79724500 | 0.06053800  |
| O  | 4.25906800  | 2.71370300  | 0.04119400  |
| C  | 4.84726600  | 1.61747900  | 0.03594100  |
| O  | 6.25244800  | 1.65152400  | 0.01010300  |
| C  | 7.03925700  | 0.50246100  | 0.00076000  |
| C  | 8.41229500  | 0.67744900  | -0.02866200 |
| H  | 8.79714600  | 1.68628200  | -0.04298200 |
| C  | 6.41992700  | -0.77013000 | 0.02069600  |
| C  | 7.27921800  | -1.89663900 | 0.01045400  |
| H  | 6.84041300  | -2.88934300 | 0.02496700  |
| C  | 8.65180400  | -1.75539600 | -0.01843200 |
| H  | 9.27033200  | -2.64212300 | -0.02595100 |
| C  | 9.25967600  | -0.45837900 | -0.03957500 |
| N  | 10.62908500 | -0.31920300 | -0.07022300 |
| C  | 11.23168700 | 1.01781600  | -0.09675400 |
| H  | 12.31689300 | 0.92056500  | -0.12258700 |
| H  | 10.91740100 | 1.58224000  | -0.98400300 |
| H  | 10.96118200 | 1.59827500  | 0.79461700  |
| C  | 11.49919200 | -1.50019000 | -0.08048800 |
| H  | 11.32039100 | -2.12641500 | -0.96378200 |
| H  | 12.53907500 | -1.17456800 | -0.10233200 |
| H  | 11.35459500 | -2.11588300 | 0.81628100  |
| N  | -3.02496100 | 1.31657000  | 0.13575400  |
| Re | -4.67041000 | -0.12417800 | 0.03674100  |
| C  | -6.07558900 | 1.16401100  | -0.22667400 |
| O  | -6.89871500 | 1.99245900  | -0.40342700 |
| C  | -4.93834900 | -0.13542400 | 1.92966900  |
| O  | -5.09299200 | -0.14194600 | 3.10652300  |
| Cl | -4.13833600 | -0.09892100 | -2.45966100 |
| C  | -5.91589900 | -1.56879700 | -0.21708100 |
| O  | -6.63665800 | -2.48869000 | -0.38745500 |

1 3 1.0 16 1.5 48 1.5  
2 4 1.5 5 1.0 16 1.5

3  
4 6 1.5 19 1.5  
5  
6 7 1.5 48 1.5  
7 8 1.5 15 1.5  
8 10 1.5 18 1.5  
9 11 1.5 12 1.0 15 1.5  
10 11 1.5 13 1.0  
11 14 1.0  
12  
13  
14  
15  
16 17 1.0  
17  
18 19 1.5 22 1.0  
19 23 1.5  
20 22 1.5 23 1.0 24 1.0  
21 23 1.0  
22  
23  
24 25 2.0 28 1.0  
25 26 1.0 33 1.5  
26  
27 28 2.0  
28 29 1.0  
29 30 1.0  
30 31 2.0 33 1.5  
31 32 1.0 38 1.5  
32  
33 34 1.5  
34 35 1.0 36 2.0  
35  
36 37 1.0 38 1.5  
37  
38 39 1.5  
39 40 1.0 44 1.0  
40 41 1.0 42 1.0 43 1.0  
41  
42  
43  
44 45 1.0 46 1.0 47 1.0  
45  
46  
47  
48  
49 50 1.0 52 1.0 55 1.0  
50 51 2.0  
51  
52 53 2.0  
53

S4

S5 S6 2.0

S6

### Re-1. Triplet state geometry.

Symbolic Z-matrix:

Charge = 0 Multiplicity = 3

|   |             |             |             |
|---|-------------|-------------|-------------|
| C | -3.15709200 | 2.65978300  | 0.11250300  |
| C | -0.76645100 | 2.99477000  | 0.09222800  |
| H | -4.16606200 | 3.04559600  | 0.11183700  |
| C | -0.59693000 | 1.59171600  | 0.10050800  |
| H | 0.09646900  | 3.65058600  | 0.07948600  |
| C | -1.76394600 | 0.77309400  | 0.11372400  |
| C | -1.67705700 | -0.66693200 | 0.12100200  |
| C | -0.42514100 | -1.33257900 | 0.11802200  |
| C | -2.82595900 | -2.70926100 | 0.13756800  |
| C | -0.41174300 | -2.74081500 | 0.12528000  |
| C | -1.61892200 | -3.42605200 | 0.13589500  |
| H | -3.77871800 | -3.21898600 | 0.13980100  |
| H | 0.53744800  | -3.26251800 | 0.12104700  |
| H | -1.64775100 | -4.50819200 | 0.13970000  |
| N | -2.85927900 | -1.36258400 | 0.13139500  |
| C | -2.04864000 | 3.52197700  | 0.09901300  |
| H | -2.21136500 | 4.59202100  | 0.09091200  |
| C | 0.75158500  | -0.51115000 | 0.10412100  |
| C | 0.65063600  | 0.90270000  | 0.09443600  |
| C | 2.79315100  | 0.24649800  | 0.07920100  |
| H | 2.31881300  | 2.30210800  | 0.06608400  |
| N | 2.05723800  | -0.90992800 | 0.09575300  |
| N | 1.94366500  | 1.35877800  | 0.07971900  |
| C | 4.20246900  | 0.31509700  | 0.06022400  |
| C | 5.00014800  | -0.89386400 | 0.05799100  |
| H | 4.49397800  | -1.84881000 | 0.07521700  |
| O | 4.25281300  | 2.72258900  | 0.04187400  |
| C | 4.83552800  | 1.61273200  | 0.03989800  |
| O | 6.23886900  | 1.65820600  | 0.01393700  |
| C | 7.02505600  | 0.48621500  | 0.00395200  |
| C | 8.38490400  | 0.66501200  | -0.02979400 |
| H | 8.76597900  | 1.67619400  | -0.04711500 |
| C | 6.39371500  | -0.80149400 | 0.02873900  |
| C | 7.28813000  | -1.92379200 | 0.01913100  |
| H | 6.85980400  | -2.92007200 | 0.03774600  |
| C | 8.65871200  | -1.76842700 | -0.01417000 |
| H | 9.28304400  | -2.65194300 | -0.02085900 |
| C | 9.25512400  | -0.47010600 | -0.04090800 |
| N | 10.62520700 | -0.30708500 | -0.07706900 |
| C | 11.21736200 | 1.03712300  | -0.11137600 |

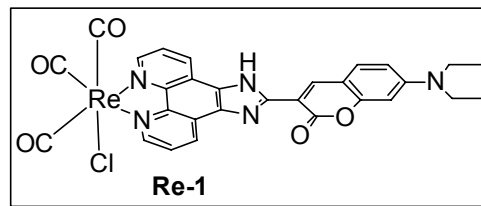

|    |             |             |             |
|----|-------------|-------------|-------------|
| H  | 12.30226100 | 0.94788500  | -0.14157100 |
| H  | 10.89157000 | 1.59131300  | -0.99938000 |
| H  | 10.94302100 | 1.61461000  | 0.77923700  |
| C  | 11.51314600 | -1.47716200 | -0.08595400 |
| H  | 11.33245600 | -2.10519100 | -0.96627600 |
| H  | 12.54796900 | -1.13916500 | -0.11151900 |
| H  | 11.37105700 | -2.08860700 | 0.81280200  |
| N  | -3.01997700 | 1.31943000  | 0.12079200  |
| Re | -4.66433000 | -0.12713500 | 0.03593100  |
| C  | -6.08165400 | 1.15209500  | -0.19995000 |
| O  | -6.92345400 | 1.96612700  | -0.36216500 |
| C  | -4.90315300 | -0.13772200 | 1.92794200  |
| O  | -5.04365600 | -0.14437700 | 3.10689500  |
| Cl | -4.17873300 | -0.10200100 | -2.49077700 |
| C  | -5.91332000 | -1.57200500 | -0.19058900 |
| O  | -6.64740300 | -2.48537700 | -0.34612900 |

1 3 1.0 16 1.5 48 1.5  
2 4 1.5 5 1.0 16 1.5  
3  
4 6 1.5 19 1.5  
5  
6 7 1.5 48 1.5  
7 8 1.5 15 1.5  
8 10 1.5 18 1.5  
9 11 1.5 12 1.0 15 1.5  
10 11 1.5 13 1.0  
11 14 1.0  
12  
13  
14  
15  
16 17 1.0  
17  
18 19 1.5 22 1.5  
19 23 1.5  
20 22 1.5 23 1.0 24 1.5  
21 23 1.0  
22  
23  
24 25 1.0 28 1.5  
25 26 1.0 33 1.5  
26  
27 28 2.0  
28 29 1.0  
29 30 1.0  
30 31 2.0 33 1.5  
31 32 1.0 38 1.5  
32  
33 34 1.5  
34 35 1.0 36 2.0

35  
36 37 1.0 38 1.5  
37  
38 39 1.5  
39 40 1.0 44 1.0  
40 41 1.0 42 1.0 43 1.0  
41  
42  
43  
44 45 1.0 46 1.0 47 1.0  
45  
46  
47  
48  
49 50 1.0 52 1.0 55 1.0  
50 51 2.0  
51  
52 53 2.0  
53  
54  
55 56 2.0  
56

### Re-2. Ground state geometry.

Symbolic Z-matrix:

Charge = 0 Multiplicity = 1

|   |             |             |             |
|---|-------------|-------------|-------------|
| C | 1.62982500  | -2.61051600 | -0.48055500 |
| C | -0.78064100 | -2.58186100 | -0.60682100 |
| H | 2.57421700  | -3.13044100 | -0.54916500 |
| C | -0.75589900 | -1.20335800 | -0.30061900 |
| H | -1.72323600 | -3.09100400 | -0.77237300 |
| C | 0.51072200  | -0.58575100 | -0.09359300 |
| C | 0.62374000  | 0.81553200  | 0.22434700  |
| C | -0.52422000 | 1.63878200  | 0.34714900  |
| C | 2.04022600  | 2.61984300  | 0.69985900  |
| C | -0.34449000 | 3.00149100  | 0.66152500  |
| C | 0.94281200  | 3.48644100  | 0.83754100  |
| H | 3.05238800  | 2.97646000  | 0.82590900  |
| H | -1.21196200 | 3.64280200  | 0.75810700  |
| H | 1.12021300  | 4.52708900  | 1.07751400  |
| N | 1.88944400  | 1.31591700  | 0.40192400  |
| C | 0.41437100  | -3.27962800 | -0.69459300 |
| H | 0.42689500  | -4.33624400 | -0.92944000 |
| C | -1.79423300 | 1.01498300  | 0.13209200  |

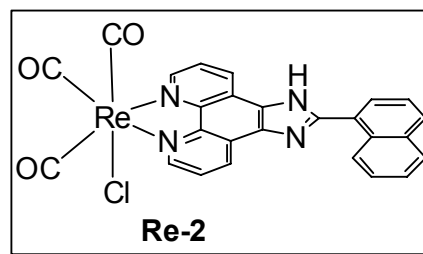

|    |             |             |             |
|----|-------------|-------------|-------------|
| C  | -1.89163800 | -0.34580700 | -0.17751800 |
| C  | -3.92157300 | 0.61142900  | -0.08516800 |
| H  | -3.68120900 | -1.44867900 | -0.60638700 |
| N  | -3.05060600 | 1.59545800  | 0.18545800  |
| N  | -3.24843800 | -0.58776300 | -0.31036700 |
| N  | 1.67885800  | -1.29798900 | -0.18665600 |
| Re | 3.50886400  | -0.11921900 | 0.06688100  |
| C  | 4.74460900  | -1.51187500 | -0.41611500 |
| O  | 5.47128100  | -2.38815200 | -0.73539500 |
| C  | 3.66174300  | -0.54281300 | 1.91994300  |
| O  | 3.74823100  | -0.80617900 | 3.07447200  |
| Cl | 3.13396400  | 0.46175300  | -2.41165500 |
| C  | 4.95588900  | 1.14362400  | 0.17412400  |
| O  | 5.81668300  | 1.95175900  | 0.22853000  |
| C  | -5.36951800 | 0.79226500  | -0.22594900 |
| C  | -6.33325200 | -0.21181800 | 0.14900600  |
| C  | -5.80296800 | 1.99789200  | -0.76928800 |
| C  | -6.00119400 | -1.42196400 | 0.82824100  |
| C  | -7.72340300 | 0.04009600  | -0.13551300 |
| C  | -7.17170500 | 2.24528600  | -1.01249700 |
| H  | -5.06290700 | 2.74559200  | -1.02896200 |
| C  | -6.97122300 | -2.35234600 | 1.15126800  |
| H  | -4.97955500 | -1.60163200 | 1.14130400  |
| C  | -8.69463300 | -0.94638200 | 0.20062900  |
| C  | -8.11110400 | 1.27708500  | -0.72262700 |
| H  | -7.47303300 | 3.19201100  | -1.44700500 |
| C  | -8.33009200 | -2.12390900 | 0.82014800  |
| H  | -6.69237400 | -3.25990400 | 1.67665700  |
| H  | -9.73626100 | -0.74577800 | -0.03168400 |
| H  | -9.16315100 | 1.44833900  | -0.92928400 |
| H  | -9.07953300 | -2.86606800 | 1.07342400  |

1 3 1.0 16 1.5 24 1.5  
2 4 1.5 5 1.0 16 1.5  
3  
4 6 1.5 19 1.5  
5  
6 7 1.5 24 1.5  
7 8 1.5 15 1.5  
8 10 1.5 18 1.5  
9 11 1.5 12 1.0 15 1.5  
10 11 1.5 13 1.0  
11 14 1.0  
12  
13  
14  
15  
16 17 1.0  
17  
18 19 1.5 22 1.0  
19 23 1.0

20 22 1.5 23 1.0 33 1.0  
21 23 1.0  
22  
23  
24  
25 26 1.0 28 1.0 31 1.0  
26 27 2.0  
27  
28 29 2.0  
29  
30  
31 32 2.0  
32  
33 34 1.5 35 1.5  
34 36 1.5 37 1.5  
35 38 1.5 39 1.0  
36 40 2.0 41 1.0  
37 42 1.5 43 1.5  
38 43 2.0 44 1.0  
39  
40 45 1.5 46 1.0  
41  
42 45 2.0 47 1.0  
43 48 1.0  
44  
45 49 1.0  
46  
47  
48  
49

## Re-2. Triplet state geometry.

Symbolic Z-matrix:

Charge = 0 Multiplicity = 3

|   |             |             |             |
|---|-------------|-------------|-------------|
| C | 1.62393500  | -2.63454100 | -0.46719600 |
| C | -0.80142700 | -2.55660900 | -0.57624000 |
| H | 2.56577900  | -3.16109700 | -0.52411300 |
| C | -0.75741100 | -1.18021900 | -0.28118300 |
| H | -1.74436600 | -3.06824900 | -0.72620900 |
| C | 0.50368900  | -0.54589000 | -0.08493500 |
| C | 0.61278500  | 0.82271600  | 0.23208100  |
| C | -0.53099700 | 1.67889400  | 0.37331800  |
| C | 2.05392000  | 2.62925500  | 0.70118200  |
| C | -0.33161600 | 3.02868400  | 0.68527000  |
| C | 0.97245200  | 3.50586600  | 0.84961500  |
| H | 3.06934500  | 2.98256800  | 0.81943100  |

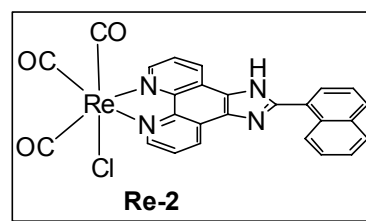

|    |             |             |             |
|----|-------------|-------------|-------------|
| H  | -1.18837800 | 3.68322800  | 0.79315500  |
| H  | 1.16207900  | 4.54466700  | 1.08694900  |
| N  | 1.89938600  | 1.32192900  | 0.40378300  |
| C  | 0.42905900  | -3.27603900 | -0.65973700 |
| H  | 0.42440900  | -4.33757500 | -0.87426000 |
| C  | -1.79673000 | 1.05482500  | 0.16543700  |
| C  | -1.88585100 | -0.31584000 | -0.14757300 |
| C  | -3.92283100 | 0.63001800  | -0.05211000 |
| H  | -3.66245900 | -1.42796300 | -0.58345100 |
| N  | -3.05829100 | 1.62169400  | 0.21822200  |
| N  | -3.24082000 | -0.56482900 | -0.27895600 |
| N  | 1.71107500  | -1.26284000 | -0.20070100 |
| Re | 3.45805600  | -0.15083800 | 0.03928600  |
| C  | 4.67163400  | -1.54750300 | -0.52313000 |
| O  | 5.38906300  | -2.40629800 | -0.89226500 |
| C  | 3.62480400  | -0.68972000 | 1.89200200  |
| O  | 3.73727900  | -1.01642000 | 3.01802500  |
| Cl | 3.38987800  | 0.72547200  | -2.33131800 |
| C  | 4.96589900  | 1.10557000  | 0.29562700  |
| O  | 5.83846400  | 1.87446000  | 0.45688800  |
| C  | -5.36901400 | 0.80539600  | -0.18870000 |
| C  | -6.33076200 | -0.22132000 | 0.12919400  |
| C  | -5.80779500 | 2.03436400  | -0.67743700 |
| C  | -6.00021400 | -1.45582900 | 0.76280700  |
| C  | -7.71885100 | 0.03246700  | -0.16399900 |
| C  | -7.17417400 | 2.28197400  | -0.92646500 |
| H  | -5.06958300 | 2.79806600  | -0.89129800 |
| C  | -6.96744500 | -2.40782100 | 1.02838100  |
| H  | -4.98387400 | -1.63932200 | 1.08990700  |
| C  | -8.68682200 | -0.97544400 | 0.11182900  |
| C  | -8.10925800 | 1.29238300  | -0.69769400 |
| H  | -7.47828200 | 3.24598600  | -1.31900900 |
| C  | -8.32209700 | -2.17695300 | 0.68396900  |
| H  | -6.68886400 | -3.33446100 | 1.51939400  |
| H  | -9.72637700 | -0.77243300 | -0.12759900 |
| H  | -9.15971800 | 1.46442200  | -0.91165200 |
| H  | -9.06902300 | -2.93573900 | 0.89119700  |

1 3 1.0 16 2.0 24 1.0  
2 4 1.5 5 1.0 16 1.5  
3  
4 6 1.5 19 1.5  
5  
6 7 1.5 24 1.0  
7 8 1.5 15 1.0  
8 10 1.5 18 1.5  
9 11 1.5 12 1.0 15 1.5  
10 11 1.5 13 1.0  
11 14 1.0  
12  
13



14  
15  
16 17 1.0  
17  
18 19 1.5 22 1.0  
19 23 1.0  
20 22 1.5 23 1.0 33 1.0  
21 23 1.0  
22  
23  
24 25 1.0  
25 26 1.0 28 1.0 31 1.0  
26 27 2.0  
27  
28 29 2.0  
29  
30  
31 32 2.0  
32  
33 34 1.5 35 1.5  
34 36 1.5 37 1.5  
35 38 1.5 39 1.0  
36 40 2.0 41 1.0  
37 42 1.5 43 1.5  
38 43 2.0 44 1.0  
39  
40 45 1.5 46 1.0  
41  
42 45 2.0 47 1.0  
43 48 1.0  
44  
45 49 1.0  
46  
47  
48  
49
